# Supplementary material
Source: PubMed Central journal article supplement (PMC10974683)
Supplement: jama-e242440-s001.pdf [file jama-e242440-s001.pdf]

## Supplementary Online Content

Liu M, Sandhu S, Joynt Maddox KE, Wadhwa RK. Health Equity Adjustment and Hospital Performance in the Medicare Value-Based Purchasing Program. *JAMA*. Published online March 27, 2024. doi:10.1001/jama.2024.2440

**eMethods 1.** Methodology for Estimating HVBP Payment Adjustments

**eMethods 2.** Logistic Exchange Function to Calculate the Underserved Multiplier

**eMethods 3.** Detailed Description of Study Covariates

**eTable 1.** Fiscal Year 2021 Performance Period of HVBP Performance Domain Measures

**eTable 2.** Proportion of Dual-Eligible Inpatient Stays by Hospital Characteristics

**eTable 3.** Total Change in HVBP Payment Adjustments After Health Equity Adjustment by Hospital Characteristics Without 10-Point Cap

**eTable 4.** Total Change in HVBP Payment Adjustments After Health Equity Adjustment by Hospital Characteristics With (0,0,4) Performance Scaler

**eTable 5.** Total Change in HVBP Payment Adjustments After Health Equity Adjustment by Hospital Characteristics With Linear Scoring to Calculate the Underserved Multiplier

**eTable 6.** Total Change in HVBP Payment Adjustments After Health Equity Adjustment by Hospital Characteristics With Actual Scoring to Calculate the Underserved Multiplier

**eFigure 1.** Relationship Between Dual-Eligible Inpatient Stay Proportion and the Underserved Multiplier

**eFigure 2.** Relationship Between Rank of Dual-Eligible Inpatient Stay Proportion and the Underserved Multiplier

**eFigure 3.** Distribution of Dual-Eligible Inpatient Stay Proportion Across Hospitals

**eFigure 4.** Reclassification of Hospital Bonus/Penalty Status in the HVBP After Health Equity Adjustment

**eFigure 5.** Reclassification of Hospital Performance in the HVBP After Health Equity Adjustment

**eFigure 6.** Distribution of Hospital-Level HVBP Payment Adjustments Before and After Health Equity Adjustment

**eFigure 7.** Changes in Total HVBP Payment Adjustments by Quintile of Dual-Eligible Inpatient Stays

**eFigure 8.** Changes in Hospital-Level HVBP Payment Adjustments by Quintile of Dual-Eligible Inpatient Stays

**eFigure 9.** Geographical Distribution of Proportion of Hospitals Receiving Increased Payment Adjustments After Health Equity Adjustment

**eFigure 10.** Reclassification of Hospital Bonus/Penalty Status After Health Equity Adjustment Without 10-Point Cap

**eFigure 11.** Reclassification of Hospital Bonus/Penalty Status After Health Equity Adjustment With (0,0,4) Performance Scaler

**eFigure 12.** Reclassification of Hospital Bonus/Penalty Status After Health Equity Adjustment With Linear Scoring to Calculate the Underserved Multiplier

**eFigure 13.** Reclassification of Hospital Bonus/Penalty Status After Health Equity Adjustment With Actual Scoring to Calculate the Underserved Multiplier

This supplementary material has been provided by the authors to give readers additional information about their work.

## **eMethods 1. Methodology for Estimating HVBP Payment Adjustments**

The HVBP determines payment adjustments by withholding 2% of base operating Diagnosis-Related Group (DRG) payments from all participating hospitals and then redistributing this pool back to hospitals based on their TPS. An HVBP slope is calculated every fiscal year to ensure budget neutrality and applied to the TPS to determine a payment adjustment factor for each hospital. A hospital receives a bonus (positive payment adjustment) or penalty (negative payment adjustment) if its HVBP payment adjustment factor is greater or smaller than the 2% withheld by the program, respectively. The HVBP payment adjustment in dollar amounts for each hospital is calculated by multiplying its payment adjustment factor by its total Medicare base operating payment.

The Medicare base operating payment rate includes a labor-related and non-labor-related share. The labor-related share is adjusted by an area-specific wage index to reflect variations in area-specific labor costs. The sum of the adjusted labor-related share and the non-labor-related share is equal to a wage-adjusted standardized amount. For fiscal year 2021, hospitals in areas with wage indices greater than 1, the labor-related share was equal to \$4,071.57 and the non-labor-related share was \$1,889.74. The corresponding numbers for hospitals in areas with wage indices less than or equal to 1 were \$3,696.01 and \$2,265.30, respectively. The wage-adjusted standardized amount is then multiplied by the total relative DRG weights for each hospital to estimate the total Medicare base operating payment in fiscal year 2021.

## **eMethods 2.** Logistic Exchange Function to Calculate Underserved Multiplier

The underserved multiplier is calculated by applying the below logistic function to the ranked proportion of the number of inpatient stays for patients with dual-eligible status. This proportion was calculated as the proportion of all Medicare Fee-For-Service and Medicare Advantage inpatient stays in which a patient was dually eligible for both Medicare and full Medicaid benefits. Inpatient stays were evaluated during the calendar year two years before the applicable program year (e.g., January 1, 2019, to December 31, 2019, for fiscal year 2021).

$$\textit{Underserved Multiplier} = \frac{1}{1 + e^{-(-5+10*\frac{\textit{DES Rank}}{\textit{Max DES Rank}})}}$$

### **eMethods 3. Detailed Description of Study Covariates**

Patient mix characteristics included top (most medically complex) versus other quintiles of CMI, safety-net status, and high-proportion Black status. Safety-net status was defined as hospitals in the top quartile of the Disproportionate Share Hospital index and high-proportion Black status was defined as hospitals in the top quintile of Medicare hospitalizations for Black patients.

Structural characteristics included size (small [ $<100$  beds], medium [100-399 beds], or large [400 beds]), ownership (for-profit, non-profit, or public), and teaching status. Geographical characteristics included US Census Bureau region (Northeast, Midwest, South, or West), rurality (urban or rural), and state-level Medicaid expansion status.

**eTable 1.** Fiscal Year 2021 Performance Period of HVBP Performance Domain Measures

| <b>Measure Description</b>                                                   | <b>Baseline Period</b>         | <b>Performance Period</b>      |
|------------------------------------------------------------------------------|--------------------------------|--------------------------------|
| <i>Clinical Outcomes Domain</i>                                              |                                |                                |
| Acute Myocardial Infarction (AMI) 30-Day Mortality Rate                      | July 1, 2011 - June 30, 2014   | July 1, 2016 - June 30, 2019   |
| Heart Failure (HF) 30-Day Mortality Rate                                     | July 1, 2011 - June 30, 2014   | July 1, 2016 - June 30, 2019   |
| Pneumonia (PN) 30-Day Mortality Rate                                         | July 1, 2012 - June 30, 2015   | Sep. 1, 2017 - June 30, 2019   |
| Total Hip Arthroplasty (THA)/Total Knee Arthroplasty Complication Rate (TKA) | April 1, 2011 - March 31, 2014 | April 1, 2016 - March 31, 2019 |
| Chronic Obstructive Pulmonary Disease (COPD) 30-Day Mortality Rate           | July 1, 2011 - June 30, 2014   | July 1, 2016 - June 30, 2019   |
| <i>Person and Community Engagement Domain</i>                                |                                |                                |
| Communication with Nurses                                                    | Jan. 1, 2017 - Dec. 31, 2017   | Jan. 1, 2019 - Dec. 31, 2019   |
| Communication with Doctors                                                   | Jan. 1, 2017 - Dec. 31, 2017   | Jan. 1, 2019 - Dec. 31, 2019   |
| Responsiveness of Hospital Staff                                             | Jan. 1, 2017 - Dec. 31, 2017   | Jan. 1, 2019 - Dec. 31, 2019   |
| Communication about Medicines                                                | Jan. 1, 2017 - Dec. 31, 2017   | Jan. 1, 2019 - Dec. 31, 2019   |
| Cleanliness and Quietness of Hospital Environment                            | Jan. 1, 2017 - Dec. 31, 2017   | Jan. 1, 2019 - Dec. 31, 2019   |
| Discharge Information                                                        | Jan. 1, 2017 - Dec. 31, 2017   | Jan. 1, 2019 - Dec. 31, 2019   |
| Overall Rating of Hospital                                                   | Jan. 1, 2017 - Dec. 31, 2017   | Jan. 1, 2019 - Dec. 31, 2019   |
| Care Transition                                                              | Jan. 1, 2017 - Dec. 31, 2017   | Jan. 1, 2019 - Dec. 31, 2019   |
| <i>Safety Domain</i>                                                         |                                |                                |
| Catheter-Associated Urinary Tract Infection                                  | Jan. 1, 2017 - Dec. 31, 2017   | Jan. 1, 2019 - Dec. 31, 2019   |
| Central Line-Associated Blood Stream Infection                               | Jan. 1, 2017 - Dec. 31, 2017   | Jan. 1, 2019 - Dec. 31, 2019   |
| Clostridium Difficile Infection                                              | Jan. 1, 2017 - Dec. 31, 2017   | Jan. 1, 2019 - Dec. 31, 2019   |
| Methicillin-Resistant Staphylococcus Aureus Bacteremia                       | Jan. 1, 2017 - Dec. 31, 2017   | Jan. 1, 2019 - Dec. 31, 2019   |
| Surgical Site Infection - Colon Surgery                                      | Jan. 1, 2017 - Dec. 31, 2017   | Jan. 1, 2019 - Dec. 31, 2019   |
| Surgical Site Infection - Abdominal Hysterectomy                             | Jan. 1, 2017 - Dec. 31, 2017   | Jan. 1, 2019 - Dec. 31, 2019   |
| <i>Efficiency and Cost Reduction Domain</i>                                  |                                |                                |
| Medicare Spending Per Beneficiary                                            | Jan. 1, 2017 - Dec. 31, 2017   | Jan. 1, 2019 - Dec. 31, 2019   |

**eTable 2.** Proportion of Dual-Eligible Inpatient Stays by Hospital Characteristics

| <b>Characteristic</b>                      | <b>Dual-Eligible Inpatient Stays, Mean % (SD)</b> |
|--------------------------------------------|---------------------------------------------------|
| Overall                                    | 27.7 (13.7)                                       |
| <b><i>Patient Mix Characteristics</i></b>  |                                                   |
| <i>Case Mix Index</i>                      |                                                   |
| Quintile 2-5                               | 28.4 (14.2)                                       |
| Quintile 1 (Most Complex)                  | 24.5 (11.1)                                       |
| <i>Safety-Net Status</i>                   |                                                   |
| Non-Safety-Net Hospital                    | 22.9 (8.9)                                        |
| Safety-Net Hospital                        | 41.9 (15.4)                                       |
| <i>Proportion Minority</i>                 |                                                   |
| Non-High-Proportion Black                  | 25.4 (12.6)                                       |
| High-Proportion Black                      | 37.2 (14.0)                                       |
| <b><i>Structural Characteristics</i></b>   |                                                   |
| <i>Size</i>                                |                                                   |
| Small (<100 beds)                          | 26.7 (12.4)                                       |
| Medium (100-399 beds)                      | 28.5 (14.8)                                       |
| Large (≥ 400 beds)                         | 26.8 (11.3)                                       |
| <i>Ownership</i>                           |                                                   |
| Private, For-Profit                        | 31.4 (16.8)                                       |
| Private, Non-Profit                        | 25.4 (12.0)                                       |
| Public                                     | 34.9 (14.2)                                       |
| <i>Teaching Status</i>                     |                                                   |
| Non-Teaching                               | 28.2 (14.0)                                       |
| Teaching                                   | 27.3 (13.4)                                       |
| <b><i>Geographical Characteristics</i></b> |                                                   |
| <i>Region</i>                              |                                                   |
| Northeast                                  | 25.7 (11.6)                                       |
| Midwest                                    | 22.6 (10.2)                                       |
| South                                      | 29.5 (12.5)                                       |
| West                                       | 32.1 (18.3)                                       |
| <i>Rurality</i>                            |                                                   |
| Urban                                      | 27.0 (14.3)                                       |
| Rural                                      | 30.3 (11.4)                                       |
| <i>Medicaid Expansion Status</i>           |                                                   |
| Non-Expansion State                        | 26.7 (12.6)                                       |
| Expansion State                            | 28.3 (14.4)                                       |

**eTable 3.** Total Change in HVBP Payment Adjustments After Health Equity Adjustment by Hospital Characteristics without 10-Point Cap

| <b>Characteristic</b>                      | <b>Total Change in HVBP Payment Adjustments, \$</b> |
|--------------------------------------------|-----------------------------------------------------|
| Overall (n = 2,676)                        | -9,846,349                                          |
| <b><i>Patient Mix Characteristics</i></b>  |                                                     |
| <i>Case Mix Index</i>                      |                                                     |
| Quintile 2-5 (n = 2,190)                   | -3,500,148                                          |
| Quintile 1 (Most Complex)<br>(n = 486)     | -6,346,201                                          |
| <i>Safety-Net Status</i>                   |                                                     |
| Non-Safety-Net Hospital (n = 1,993)        | -39,979,007                                         |
| Safety-Net Hospital (n = 683)              | 30,132,659                                          |
| <i>Proportion Minority</i>                 |                                                     |
| Non-High-Proportion Black (n = 2,153)      | -26,030,585                                         |
| High-Proportion Black (n = 523)            | 16,184,237                                          |
| <b><i>Structural Characteristics</i></b>   |                                                     |
| <i>Size</i>                                |                                                     |
| Small (<100 beds)<br>(n = 783)             | -2,087,553                                          |
| Medium (100-399 beds)<br>(n = 1,538)       | -4,736,318                                          |
| Large (≥ 400 beds)<br>(n = 355)            | -3,022,477                                          |
| <i>Ownership</i>                           |                                                     |
| Private, For-Profit (n = 492)              | 3,213,163                                           |
| Private, Non-Profit (n = 1,829)            | -18,454,052                                         |
| Public (n = 331)                           | 5,403,763                                           |
| <i>Teaching Status</i>                     |                                                     |
| Non-Teaching (n = 1,322)                   | -180,280                                            |
| Teaching (n = 1,354)                       | -9,666,069                                          |
| <b><i>Geographical Characteristics</i></b> |                                                     |
| <i>Region</i>                              |                                                     |
| Northeast (n = 439)                        | -5,121,958                                          |
| Midwest (n = 648)                          | -16,505,679                                         |
| South (n = 1,040)                          | 5,633,899                                           |
| West (n = 549)                             | 6,147,388                                           |
| <i>Rurality</i>                            |                                                     |
| Urban (n = 2,064)                          | -14,556,520                                         |
| Rural (n = 612)                            | 4,710,171                                           |
| <i>Medicaid Expansion Status</i>           |                                                     |
| Non-Expansion State (n = 1,025)            | -3,541,511                                          |
| Expansion State (n = 1,651)                | -6,304,837                                          |



**eTable 4.** Total Change in HVBP Payment Adjustments After Health Equity Adjustment by Hospital Characteristics with (0,0,4) Performance Scaler

| <b>Characteristic</b>                      | <b>Total Change in HVBP Payment Adjustments, \$</b> |
|--------------------------------------------|-----------------------------------------------------|
| Overall (n = 2,676)                        | -77,843,937                                         |
| <b><i>Patient Mix Characteristics</i></b>  |                                                     |
| <i>Case Mix Index</i>                      |                                                     |
| Quintile 2-5 (n = 2,190)                   | -44,193,212                                         |
| Quintile 1 (Most Complex)<br>(n = 486)     | -33,650,725                                         |
| <i>Safety-Net Status</i>                   |                                                     |
| Non-Safety-Net Hospital (n = 1,993)        | -80,054,441                                         |
| Safety-Net Hospital (n = 683)              | 2,210,504                                           |
| <i>Proportion Minority</i>                 |                                                     |
| Non-High-Proportion Black (n = 2,153)      | -72,586,985                                         |
| High-Proportion Black (n = 523)            | -5,256,952                                          |
| <b><i>Structural Characteristics</i></b>   |                                                     |
| <i>Size</i>                                |                                                     |
| Small (<100 beds)<br>(n = 783)             | -5,580,395                                          |
| Medium (100-399 beds)<br>(n = 1,538)       | -42,233,975                                         |
| Large (≥ 400 beds)<br>(n = 355)            | -30,029,568                                         |
| <i>Ownership</i>                           |                                                     |
| Private, For-Profit (n = 492)              | -8,524,168                                          |
| Private, Non-Profit (n = 1,829)            | -64,995,027                                         |
| Public (n = 331)                           | -4,031,959                                          |
| <i>Teaching Status</i>                     |                                                     |
| Non-Teaching (n = 1,322)                   | -18,818,131                                         |
| Teaching (n = 1,354)                       | -59,025,807                                         |
| <b><i>Geographical Characteristics</i></b> |                                                     |
| <i>Region</i>                              |                                                     |
| Northeast (n = 439)                        | -15,196,792                                         |
| Midwest (n = 648)                          | -27,855,168                                         |
| South (n = 1,040)                          | -27,248,959                                         |
| West (n = 549)                             | -7,543,019                                          |
| <i>Rurality</i>                            |                                                     |
| Urban (n = 2,064)                          | -76,567,706                                         |
| Rural (n = 612)                            | -1,276,231                                          |
| <i>Medicaid Expansion Status</i>           |                                                     |
| Non-Expansion State (n = 1,025)            | -31,813,232                                         |
| Expansion State (n = 1,651)                | -46,030,705                                         |

**eTable 5.** Total Change in HVBP Payment Adjustments After Health Equity Adjustment by Hospital Characteristics with Linear Scoring to Calculate the Underserved Multiplier

| <b>Characteristic</b>                      | <b>Total Change in HVBP Payment Adjustments, \$</b> |
|--------------------------------------------|-----------------------------------------------------|
| Overall (n = 2,676)                        | -1,562,635                                          |
| <b><i>Patient Mix Characteristics</i></b>  |                                                     |
| <i>Case Mix Index</i>                      |                                                     |
| Quintile 2-5 (n = 2,190)                   | 628,723                                             |
| Quintile 1 (Most Complex)<br>(n = 486)     | -2,191,358                                          |
| <i>Safety-Net Status</i>                   |                                                     |
| Non-Safety-Net Hospital (n = 1,993)        | -24,228,991                                         |
| Safety-Net Hospital (n = 683)              | 22,666,357                                          |
| <i>Proportion Minority</i>                 |                                                     |
| Non-High-Proportion Black (n = 2,153)      | -14,496,661                                         |
| High-Proportion Black (n = 523)            | 12,934,027                                          |
| <b><i>Structural Characteristics</i></b>   |                                                     |
| <i>Size</i>                                |                                                     |
| Small (<100 beds)<br>(n = 783)             | -1,685,497                                          |
| Medium (100-399 beds)<br>(n = 1,538)       | -449,671                                            |
| Large (≥ 400 beds)<br>(n = 355)            | 572,534                                             |
| <i>Ownership</i>                           |                                                     |
| Private, For-Profit (n = 492)              | 2,743,909                                           |
| Private, Non-Profit (n = 1,829)            | -8,934,743                                          |
| Public (n = 331)                           | 4,525,612                                           |
| <i>Teaching Status</i>                     |                                                     |
| Non-Teaching (n = 1,322)                   | 1,423,913                                           |
| Teaching (n = 1,354)                       | -2,986,547                                          |
| <b><i>Geographical Characteristics</i></b> |                                                     |
| <i>Region</i>                              |                                                     |
| Northeast (n = 439)                        | -3,405,476                                          |
| Midwest (n = 648)                          | -10,074,707                                         |
| South (n = 1,040)                          | 5,655,325                                           |
| West (n = 549)                             | 6,262,223                                           |
| <i>Rurality</i>                            |                                                     |
| Urban (n = 2,064)                          | -5,254,947                                          |
| Rural (n = 612)                            | 3,692,312                                           |
| <i>Medicaid Expansion Status</i>           |                                                     |
| Non-Expansion State (n = 1,025)            | 842,119                                             |
| Expansion State (n = 1,651)                | -720,516                                            |

**eTable 6.** Total Change in HVBP Payment Adjustments After Health Equity Adjustment by Hospital Characteristics with Actual Scoring to Calculate the Underserved Multiplier

| <b>Characteristic</b>                      | <b>Total Change in HVBP Payment Adjustments, \$</b> |
|--------------------------------------------|-----------------------------------------------------|
| Overall (n = 2,676)                        | -76,704,346                                         |
| <b><i>Patient Mix Characteristics</i></b>  |                                                     |
| <i>Case Mix Index</i>                      |                                                     |
| Quintile 2-5 (n = 2,190)                   | -45,276,087                                         |
| Quintile 1 (Most Complex)<br>(n = 486)     | -31,428,259                                         |
| <i>Safety-Net Status</i>                   |                                                     |
| Non-Safety-Net Hospital (n = 1,993)        | -69,540,111                                         |
| Safety-Net Hospital (n = 683)              | -7,164,235                                          |
| <i>Proportion Minority</i>                 |                                                     |
| Non-High-Proportion Black (n = 2,153)      | -66,040,016                                         |
| High-Proportion Black (n = 523)            | -10,664,330                                         |
| <b><i>Structural Characteristics</i></b>   |                                                     |
| <i>Size</i>                                |                                                     |
| Small (<100 beds)<br>(n = 783)             | -7,603,320                                          |
| Medium (100-399 beds)<br>(n = 1,538)       | -40,375,447                                         |
| Large (≥ 400 beds)<br>(n = 355)            | -28,725,579                                         |
| <i>Ownership</i>                           |                                                     |
| Private, For-Profit (n = 492)              | -8,890,911                                          |
| Private, Non-Profit (n = 1,829)            | -62,230,099                                         |
| Public (n = 331)                           | -5,370,582                                          |
| <i>Teaching Status</i>                     |                                                     |
| Non-Teaching (n = 1,322)                   | -20,826,027                                         |
| Teaching (n = 1,354)                       | -55,878,319                                         |
| <b><i>Geographical Characteristics</i></b> |                                                     |
| <i>Region</i>                              |                                                     |
| Northeast (n = 439)                        | -15,097,906                                         |
| Midwest (n = 648)                          | -23,149,908                                         |
| South (n = 1,040)                          | -27,524,494                                         |
| West (n = 549)                             | -10,932,038                                         |
| <i>Rurality</i>                            |                                                     |
| Urban (n = 2,064)                          | -71,317,127                                         |
| Rural (n = 612)                            | -5,387,219                                          |
| <i>Medicaid Expansion Status</i>           |                                                     |
| Non-Expansion State (n = 1,025)            | -28,691,239                                         |
| Expansion State (n = 1,651)                | -48,013,107                                         |

**eFigure 1.** Relationship Between Dual-Eligible Inpatient Stay Proportion and the Underserved Multiplier

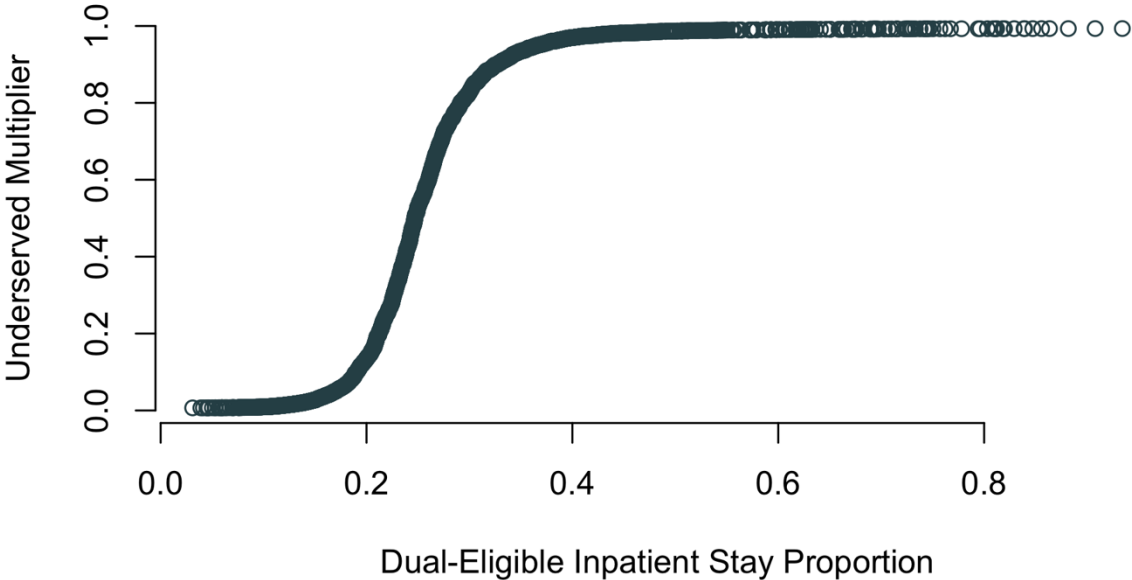

**eFigure 2.** Relationship Between Rank of Dual-Eligible Inpatient Stay Proportion and the Underserved Multiplier

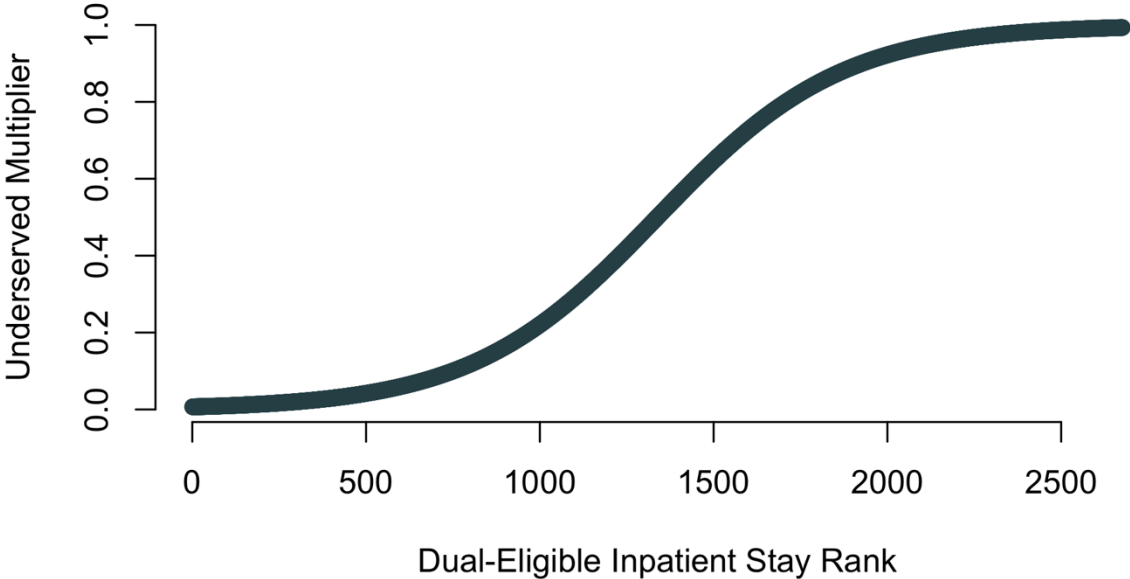

**eFigure 3.** Distribution of Dual-Eligible Inpatient Stay Proportion Across Hospitals

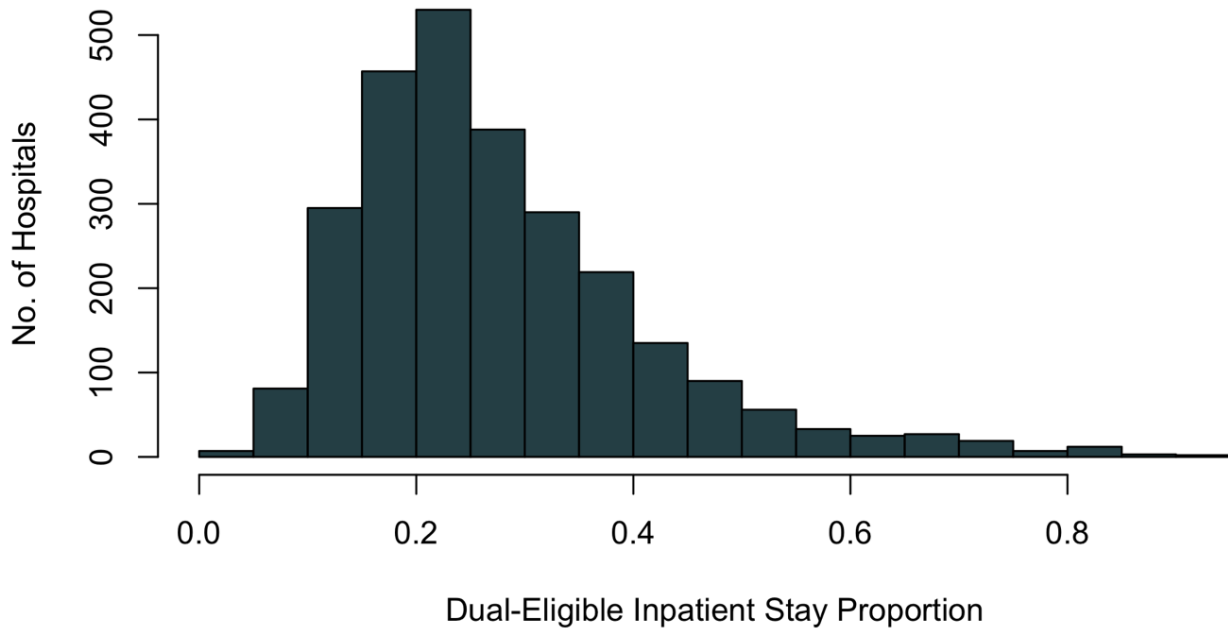

**eFigure 4.** Reclassification of Hospital Bonus/Penalty Status in the HVBP After Health Equity Adjustment

|                                 |                | HVBP Bonus/Penalty Status      |              |              |       |
|---------------------------------|----------------|--------------------------------|--------------|--------------|-------|
|                                 |                | Status                         | Bonus        | Penalty      | Total |
| Before Health Equity Adjustment |                | After Health Equity Adjustment |              |              |       |
|                                 | <b>Bonus</b>   |                                | 1,368 (93.1) | 102 (6.9)    | 1,470 |
|                                 | <b>Penalty</b> | 119 (9.9)                      |              | 1,087 (90.1) | 1,206 |
|                                 | <b>Total</b>   | 1,487                          | 1,189        | 2,676        |       |

HVBP: Hospital Value-Based Purchasing

Cells shaded green represent hospitals that were penalized before health equity adjustment and received bonuses after. Cells shaded red represent hospitals that received bonuses before health equity adjustment and were penalized after.

**eFigure 5.** Reclassification of Hospital Performance in the HVBP After Health Equity Adjustment

**HVBP Total Performance Score Quintile**

|                                 |                | After Health Equity Adjustment |            |            |            |            |       |
|---------------------------------|----------------|--------------------------------|------------|------------|------------|------------|-------|
| Before Health Equity Adjustment | Quintile       | 1                              | 2          | 3          | 4          | 5          | Total |
|                                 |                | (Highest)                      |            |            |            | (Lowest)   |       |
| Before Health Equity Adjustment | 1<br>(Highest) | 434 (80.8)                     | 102 (19.0) | 0 (0)      | 0 (0)      | 0 (0)      | 537   |
|                                 | 2              | 103 (19.2)                     | 312 (58.2) | 119 (22.1) | 0 (0)      | 0 (0)      | 536   |
|                                 | 3              | 0 (0)                          | 122 (22.8) | 309 (57.4) | 105 (19.4) | 0 (0)      | 538   |
|                                 | 4              | 0 (0)                          | 0 (0)      | 110 (20.4) | 365 (67.6) | 60 (11.4)  | 540   |
|                                 | 5<br>(Lowest)  | 0 (0)                          | 0 (0)      | 0 (0)      | 70 (13.0)  | 465 (88.6) | 525   |
|                                 | <b>Total</b>   | 536                            | 534        | 536        | 535        | 535        | 2,676 |

**HVBP: Hospital Value-Based Purchasing**

Hospitals were classified into performance quintiles based on Total Performance Scores. Quintile 1 represents “best-performing” and quintile 5 represents “worst-performing” hospitals. Cells shaded green represent hospitals that were reclassified into better-performing quintiles after health equity adjustment, whereas cells shaded red represent those that were reclassified into worse-performing quintiles.



**eFigure 6.** Distribution of Hospital-Level HVBP Payment Adjustments Before and After Health Equity Adjustment

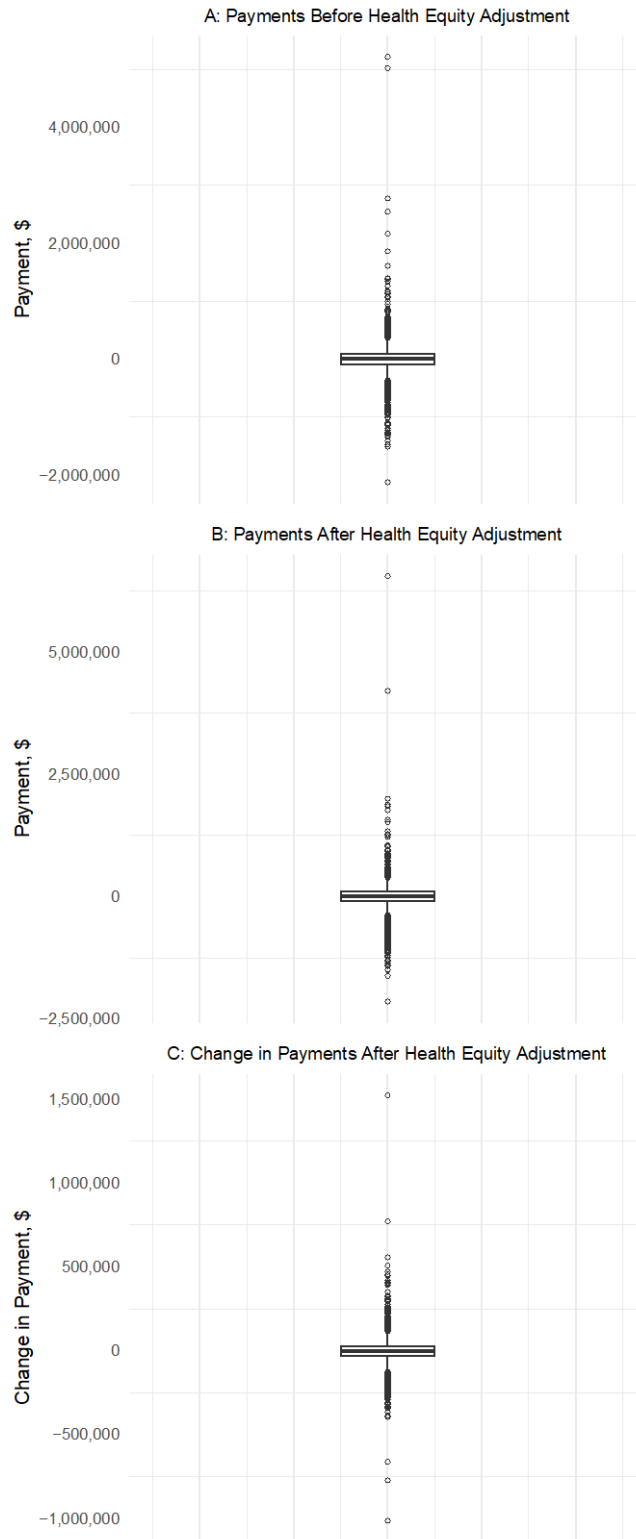

**eFigure 7.** Changes in Total HVBP Payment Adjustments by Quintile of Dual-Eligible Inpatient Stays

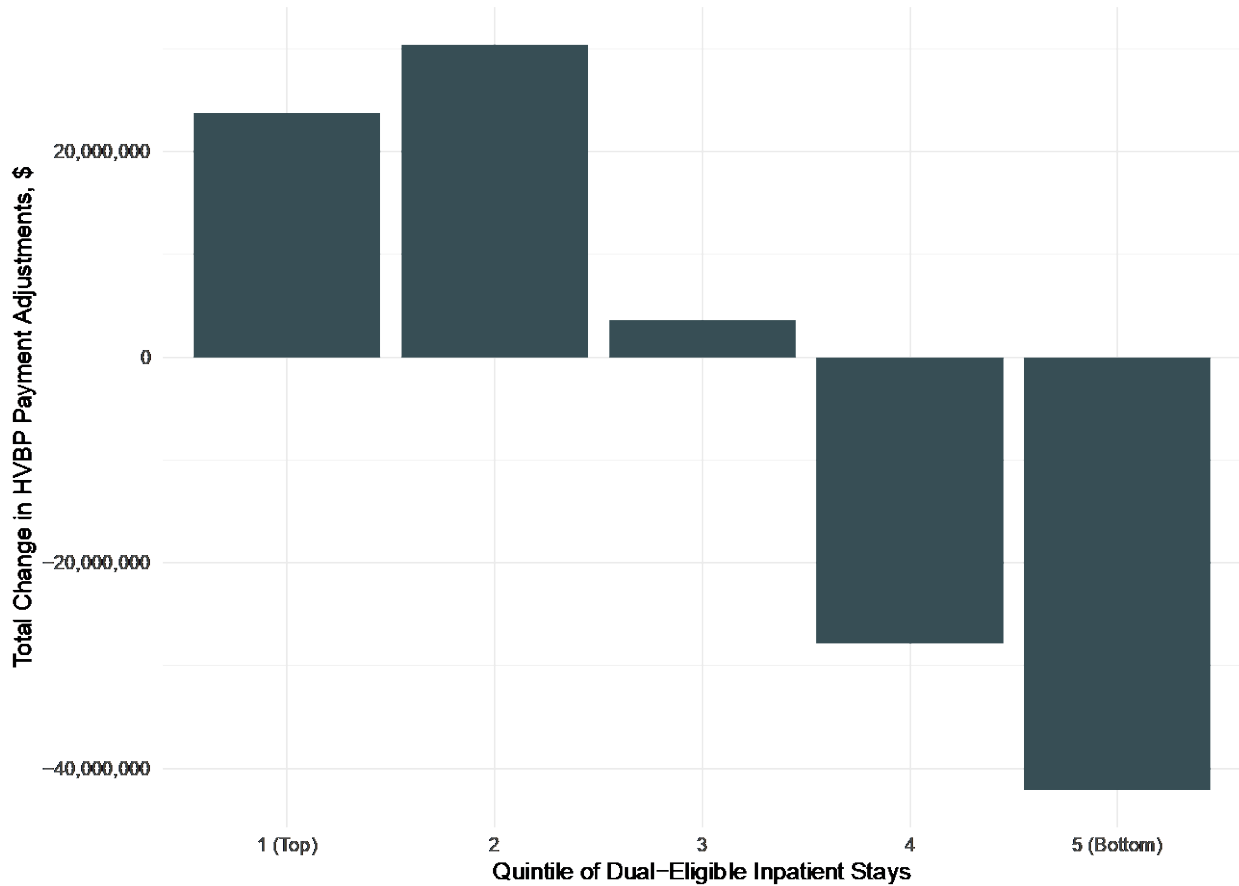

HVBP: Hospital Value-Based Purchasing.

Positive values represent increased payment adjustments and negative values represent decreased payment adjustments. Hospitals in the top quintile (1) of dual-eligible inpatient stays have the highest proportion of dual-eligible inpatient stays, whereas those in the bottom quintile (5) have the lowest.

**eFigure 8.** Changes in Hospital-Level HVBP Payment Adjustments by Quintile of Dual-Eligible Inpatient Stays

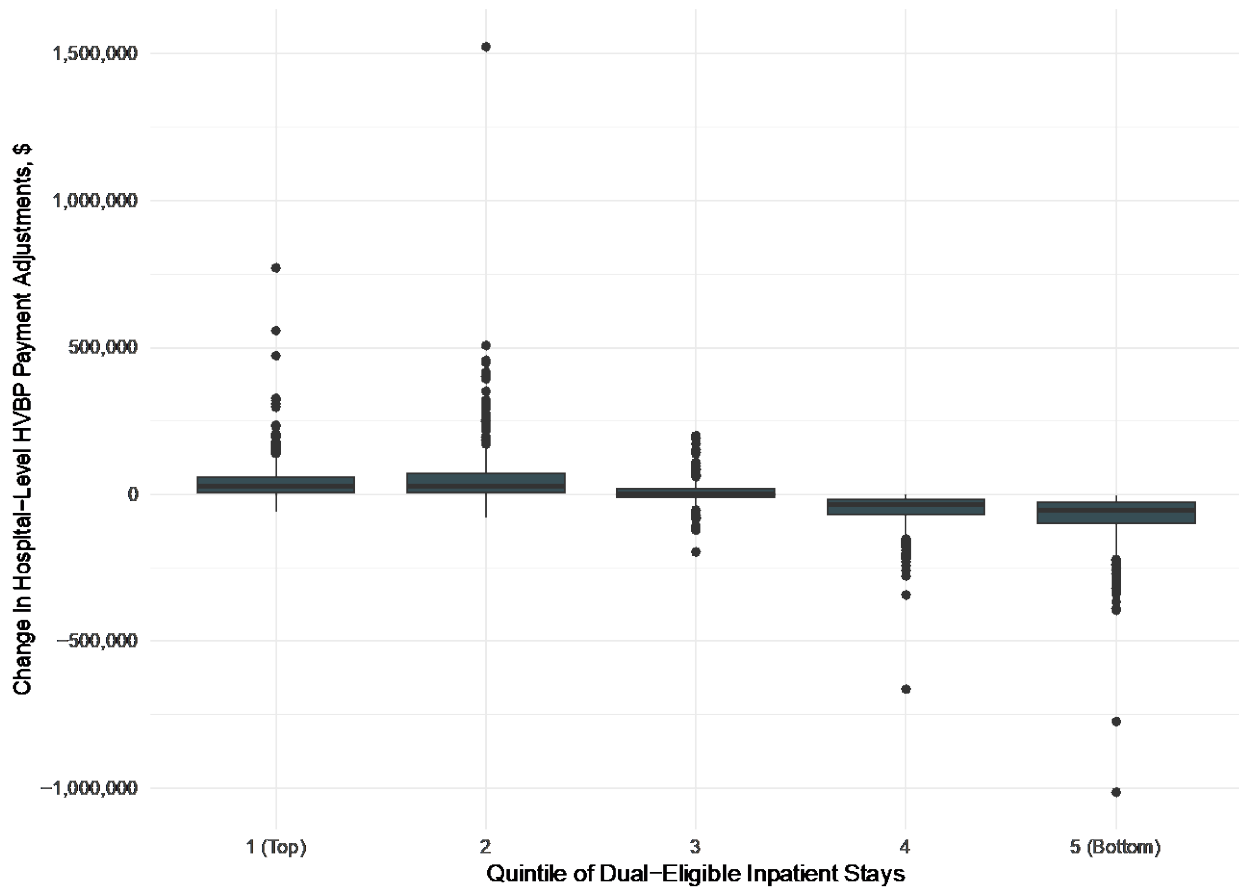

**HVBP: Hospital Value-Based Purchasing**

Positive values represent increased payment adjustments and negative values represent decreased payment adjustments. Hospitals in the top quintile (1) of dual-eligible inpatient stays have the highest proportion of dual-eligible inpatient stays, whereas those in the bottom quintile (5) have the lowest. The horizontal lines in the middle of each box indicate median values; the top and bottom borders of the boxes indicate the 75<sup>th</sup> and 25<sup>th</sup> percentiles; the whiskers represent the maximum and minimum values within 1.5 times the interquartile range above and below the 75<sup>th</sup> and 25<sup>th</sup> percentiles; and the points represent outlier values beyond the whiskers.

**eFigure 9.** Geographical Distribution of Proportion of Hospitals Receiving Increased Payment Adjustments After Health Equity Adjustment

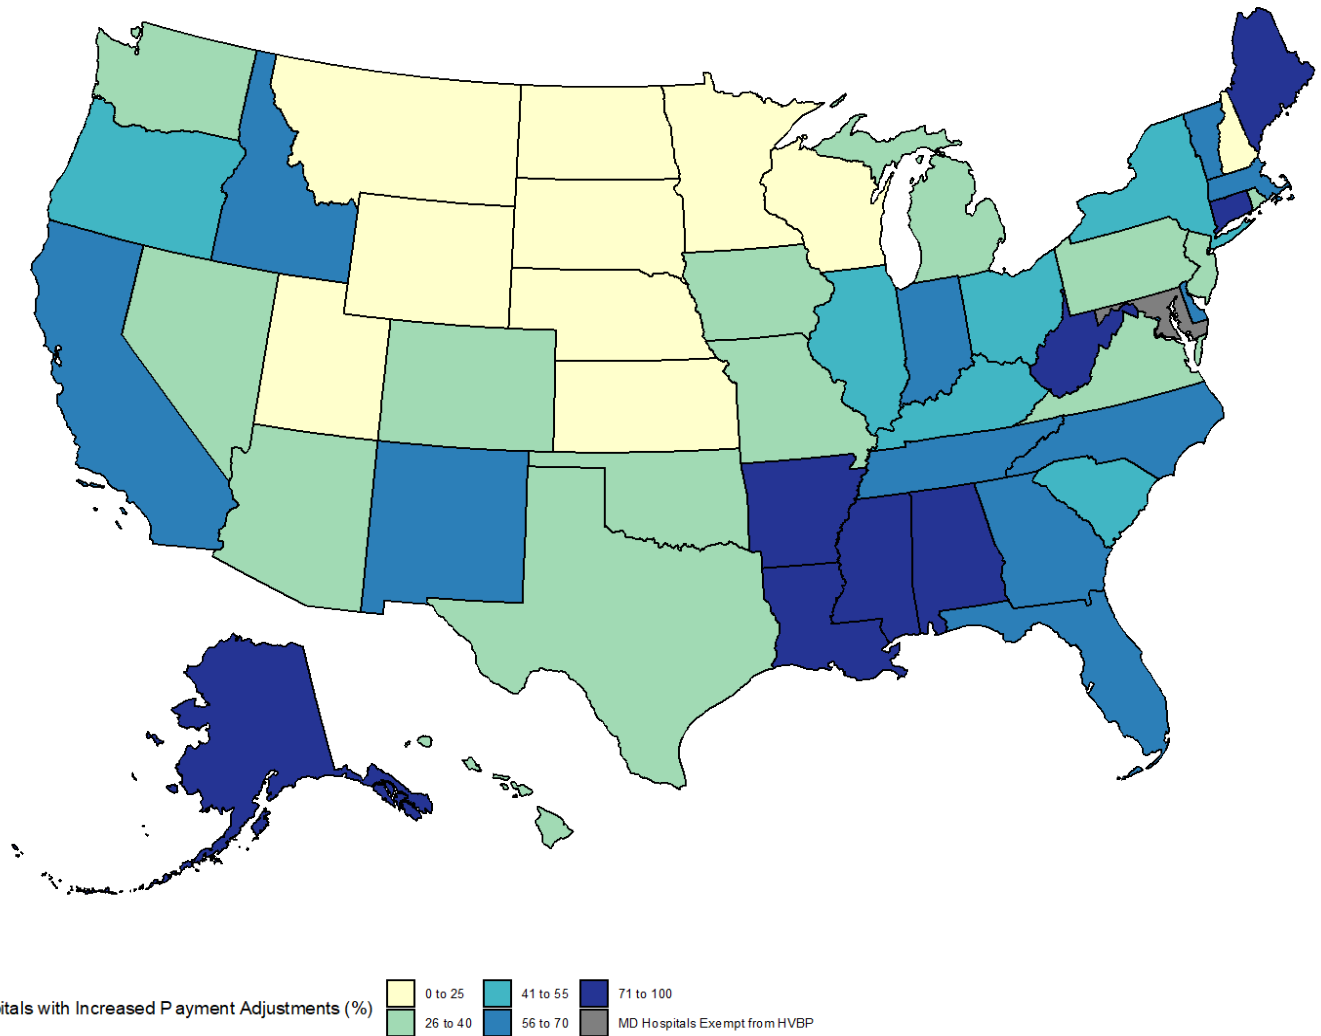

No hospitals in North Dakota, New Hampshire, South Dakota, or Utah experienced increases in payment adjustments, whereas all hospitals in Alaska experienced increases in HVBP payment adjustments.

**eFigure 10.** Reclassification of Hospital Bonus/Penalty Status After Health Equity Adjustment without 10-Point Cap

**HVBP Bonus/Penalty Status**

|                                 |         | After Health Equity Adjustment |              |       |
|---------------------------------|---------|--------------------------------|--------------|-------|
|                                 |         | Bonus                          | Penalty      | Total |
| Before Health Equity Adjustment | Bonus   | 1,368 (93.1)                   | 102 (6.9)    | 1,470 |
|                                 | Penalty | 119 (9.9)                      | 1,087 (90.1) | 1,206 |
|                                 | Total   | 1,487                          | 1,189        | 2,676 |

**eFigure 11.** Reclassification of Hospital Bonus/Penalty Status After Health Equity Adjustment with (0,0,4) Performance Scaler

**HVBP Bonus/Penalty Status**

|                                 |         | After Health Equity Adjustment |              |       |
|---------------------------------|---------|--------------------------------|--------------|-------|
|                                 |         | Bonus                          | Penalty      | Total |
| Before Health Equity Adjustment | Status  |                                |              |       |
|                                 | Bonus   | 1,349 (91.8)                   | 121 (8.2)    | 1,470 |
|                                 | Penalty | 37 (3.1)                       | 1,169 (96.9) | 1,206 |
| Total                           |         | 1,386                          | 1,290        | 2,676 |

**eFigure 12.** Reclassification of Hospital Bonus/Penalty Status After Health Equity Adjustment with Linear Scoring to Calculate the Underserved Multiplier

**HVBP Bonus/Penalty Status**

|                                 |         | After Health Equity Adjustment |              |       |
|---------------------------------|---------|--------------------------------|--------------|-------|
|                                 |         | Bonus                          | Penalty      | Total |
| Before Health Equity Adjustment | Bonus   | 1,413 (96.1)                   | 57 (3.9)     | 1,470 |
|                                 | Penalty | 89 (7.4)                       | 1,117 (92.6) | 1,206 |
|                                 | Total   | 1,502                          | 1,174        | 2,676 |

**eFigure 13.** Reclassification of Hospital Bonus/Penalty Status After Health Equity Adjustment with Actual Scoring to Calculate the Underserved Multiplier

**HVBP Bonus/Penalty Status**

|                                 | After Health Equity Adjustment |              |              |       |
|---------------------------------|--------------------------------|--------------|--------------|-------|
|                                 | Status                         | Bonus        | Penalty      | Total |
| Before Health Equity Adjustment | <b>Bonus</b>                   | 1,360 (92.5) | 110 (7.5)    | 1,470 |
|                                 | <b>Penalty</b>                 | 8 (0.66)     | 1,198 (99.3) | 1,206 |
|                                 | <b>Total</b>                   | 1,368        | 1,308        | 2,676 |
