# Supplementary material
Source: PubMed Central journal article supplement (PMC10974683)
Supplement: jama-e242440-s002.pdf [file jama-e242440-s002.pdf]

## **Data Sharing Statement**

### **Data**

**Data available:** No

### **Additional Information**

**Explanation for why data not available:** Medicare files used for this analysis are only available through a Data Use Agreement with the Centers for Medicare and Medicaid Services
